# Supplementary material
Source: PubMed Central journal article supplement (PMC4059212)
Supplement: NIHMS577762-supplement-1.pdf [file NIHMS577762-supplement-1.pdf]

## Supplementary Data

**Supplementary Table S1. Patient characteristics.**

| <b>Patient</b> | <b>CMV Serostatus</b> | <b>Tumor</b>        | <b>Sex</b> | <b>Age</b> | <b>Race</b> | <b>Ethnicity</b>       |
|----------------|-----------------------|---------------------|------------|------------|-------------|------------------------|
| 1              | Positive              | Newly diagnosed GBM | Female     | 57         | White       | Not Hispanic or Latino |
| 2              | Positive              | Newly diagnosed GBM | Female     | 58         | White       | Hispanic               |
| 3              | Positive              | Newly diagnosed GBM | Male       | 59         | White       | Not Hispanic or Latino |
| 4              | Positive              | Newly diagnosed GBM | Male       | 56         | White       | Not Hispanic or Latino |
| 5              | Positive              | Newly diagnosed GBM | Male       | 24         | White       | Not Hispanic or Latino |
| 6              | Positive              | Newly diagnosed GBM | Female     | 20         | White       | Not Hispanic or Latino |
