# Supplementary material
Source: PubMed Central journal article supplement (PMC4059212)
Supplement: NIHMS577762-supplement-2.pdf [file NIHMS577762-supplement-2.pdf]

## Supplementary Data

Supplementary Table S2. Phenotype of *in vitro* stimulated T cells.

|                         | Unstimulated non-adherent cells | CMV pp65-specific effectors | Flu M1-specific effectors |
|-------------------------|---------------------------------|-----------------------------|---------------------------|
| <i>Patient 3</i>        |                                 |                             |                           |
| CD8 <sup>+</sup>        | 29%                             | 82%                         | ND                        |
| CD4 <sup>+</sup>        | 64%                             | 14%                         | ND                        |
| <b>pp65 A2 tetramer</b> | <b>0.06%</b>                    | <b><u>14%</u></b>           | <b>ND</b>                 |
| <b>pp65 B7 tetramer</b> | <b>0.07%</b>                    | <b><u>16%</u></b>           | <b>ND</b>                 |
| <i>Patient 4</i>        |                                 |                             |                           |
| CD8+                    | 32%                             | 45%                         | 26%                       |
| CD4+                    | 42%                             | 33%                         | 58%                       |
| <b>pp65 A2 tetramer</b> | <b>0.27%</b>                    | <b><u>52%</u></b>           | <b>0.3%</b>               |
| <i>Patient 5</i>        |                                 |                             |                           |
| CD8+                    | 13%                             | 50%                         | 8%                        |
| CD4+                    | 7%                              | 4%                          | 87%                       |
| <b>pp65 A2 tetramer</b> | <b>0.4%</b>                     | <b><u>16%</u></b>           | <b>0%</b>                 |
| <i>Patient 6</i>        |                                 |                             |                           |
| CD8+                    | 11%                             | 8%                          | 7%                        |
| CD4+                    | 43%                             | 86%                         | 88%                       |

GBM patient (n=4) PBMC-derived CD4 and CD8 T cells stimulated with DCs pulsed with CMV pp65 RNA were examined for CMV specificity using tetramer analysis with CMV pp65 HLA-A\*0201- and HLA-B\*0702-restricted tetramers. T cells stimulated with DCs pulsed with Flu M1 RNA were used as negative controls. Tetramer analysis for Patient 6 is not reported because PBMCs derived from Patient 6 did not express HLA-A\*0201 or HLA-B\*0702.
