# Supplementary material
Source: PubMed Central journal article supplement (PMC4059212)
Supplement: NIHMS577762-supplement-3.pdf [file NIHMS577762-supplement-3.pdf]

## Supplementary Data

**Supplementary Figure S1. Analysis of maturation markers in dendritic cells pulsed with RNA and cultured in maturation cytokine cocktail.**

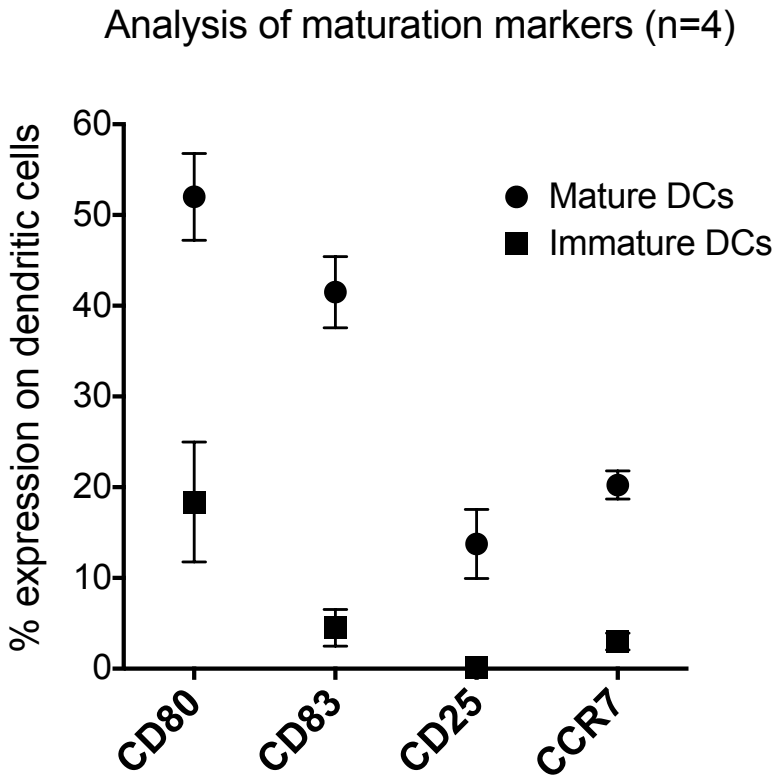

GBM patient PBMC-derived CMV pp65 RNA-pulsed DCs (n=4, Patients 3, 4, 5 and 6) were cultured for 8-10 h in AIM-V media containing GM-CSF (800 U/ml) and IL-4 (500 U/ml) (immature DCs, closed squares) or with the maturation cytokine cocktail of GM-CSF (800 U/ml), IL-4 (500 U/ml), TNF- $\alpha$  (10 ng/ml), IL-1 $\beta$  (10 ng/ml), IL-6 (1000 U/ml), and PGE<sub>2</sub> (1  $\mu$ g/ml) (mature DCs, closed circles). DCs were surface stained with antibodies against CD80, CD83, CD25, and CCR7 and analyzed using flow cytometry. Data represents average of 4 samples with standard error of mean.
