# Supplementary material
Source: PubMed Central journal article supplement (PMC4059212)
Supplement: NIHMS577762-supplement-5.pdf [file NIHMS577762-supplement-5.pdf]

## Supplementary Data

**Supplementary Figure S3. Cytokine secretion analysis of CMV pp65-specific T cells co-cultured with primary GBM tumor cells.**

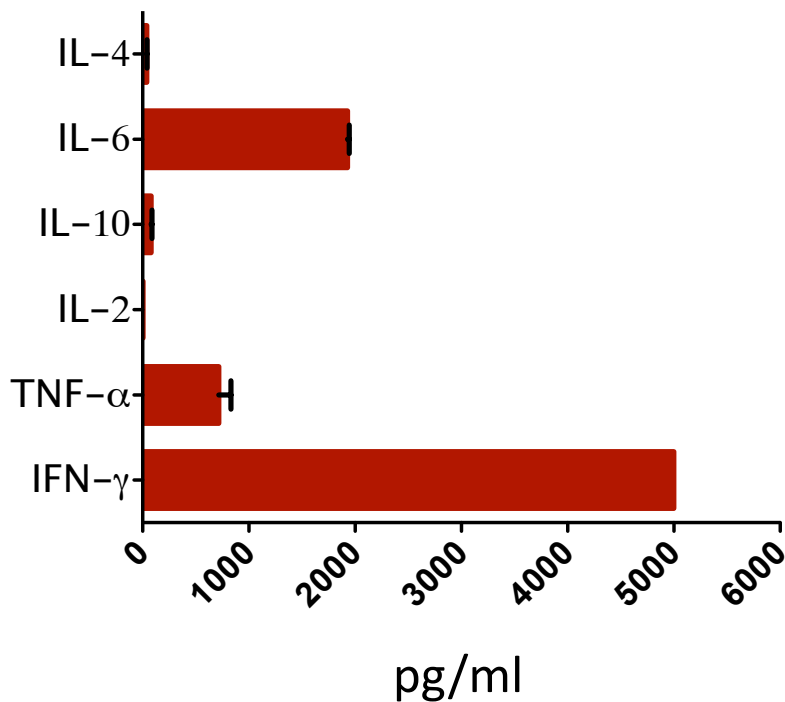

CMV pp65-specific T cells were generated as described in Methods and Figure 4 and used in a CTL assay. Supernatant (50  $\mu$ l) from CMV pp65-specific T cells co-cultured with primary autologous GBM tumor targets from Patient 4 was harvested after 8 hours and frozen for subsequent analysis using a Cytokine Bead Array kit as described in Methods. Cytokines examined included IFN- $\gamma$ , TNF- $\alpha$ , IL-2, IL-10, IL-4 and IL-6. Supernatants from GBM tumor targets and CMV pp65-specific T cells cultured alone were used as controls and did not show the presence of any cytokines.
